# Supplementary material for: Bone Marrow Cells Expressing Clara Cell Secretory Protein Increase Epithelial Repair After Ablation of Pulmonary Clara Cells
Source: PubMed Central journal article supplement — Mol Ther. 2013 Apr 23;21(6):1251–8. doi: 10.1038/mt.2013.53 (PMC3677308; doi:10.1038/mt.2013.53), 2013-04-23

**Bone marrow CCSP-expressing cells increase epithelium repair after ablation of Clara cells and lung stem cells**

Martha L. Bustos

Marco Mura

Paula Marcus

David Hwang

Olga Ludkovski

Amy P. Wong

Thomas K. Waddell

**SUPPLEMENTARY DATA**

## SUPPLEMENTARY TABLES

**Table S1. CCSP<sup>+</sup> BMC gene expression in culture**

| <b>GENE</b>    | <b>CCSP<sup>-</sup> BMC</b> | <b>CCSP<sup>+</sup> BMC</b> | <b>NORMAL<br/>TISSUE</b> | <b>Reaction<br/>Efficiency</b> |
|----------------|-----------------------------|-----------------------------|--------------------------|--------------------------------|
| <b>CCSP</b>    | ND                          | 0.1±0.052*                  | 1 ±0.26 <sup>L</sup>     | 0.9843                         |
| <b>Cyp2f2</b>  | 0.007±0.0107*               | ND                          | 1 ± 0.09 <sup>L</sup>    | 1                              |
| <b>Pon1</b>    | 0.272±0.1*                  | 0.036±0.01*                 | 1 ± 0.15 <sup>L</sup>    | 0.9734                         |
| <b>Fmo3</b>    | ND                          | ND                          | 1 ±0.04 <sup>L</sup>     | 1                              |
| <b>Aox3</b>    | ND                          | ND                          | 1 ±0.12 <sup>L</sup>     | 1                              |
| <b>Cldn10</b>  | 1.17±0.14                   | 3.54±0.12*                  | 1 ± 0.20 <sup>L</sup>    | 0.958                          |
| <b>Sftpc</b>   | ND                          | ND                          | 1 ± 0.014 <sup>L</sup>   | 1                              |
| <b>Aqp-5</b>   | 0.007±0.012*                | 0.009±0.017*                | 1±0.084 <sup>L</sup>     | 0.9393                         |
| <b>Foxj1</b>   | ND                          | ND                          | 1 ±0.20 <sup>L</sup>     | 1                              |
| <b>Krt14</b>   | 0.36±0.01*                  | 0.70±0.21*                  | 1 ± 0.12 <sup>L</sup>    | 1                              |
| <b>Krt18</b>   | ND                          | ND                          | 1 ± 0.13 <sup>L</sup>    | 0.917                          |
| <b>Krt5</b>    | ND                          | 0.39±0.17*                  | 1 ± 0.08 <sup>L</sup>    | 0.986                          |
| <b>CFTR</b>    | 0.45±0.32*                  | 1.004±0.1                   | 1 ± 0.26 <sup>L</sup>    | 1                              |
| <b>ENaC</b>    | ND                          | 0.047±0.006*                | 1 ± 0.058 <sup>L</sup>   | 1                              |
| <b>Cubilin</b> | 0.25±0.19*                  | ND                          | 1 ± 0.1 <sup>K</sup>     | 0.976                          |
| <b>Megalyn</b> | ND                          | ND                          | 1 ±0.08 <sup>K</sup>     | 1                              |
| <b>18S</b>     | 1.0032±0.017                | 1.009±0.08                  | 1 ±0.084 <sup>L</sup>    | 1                              |

CCSP= Clara cell secretory protein, Cyp2f2= Cytochrome P450, family 2, subfamily f, polypeptide 2, Pon1= Paraoxonase 1, Fmo3= Flavin containing monooxygenase 3, Aox3= Aldehyde oxidase 3, Cldn10= Claudin 10, Sftpc= Surfactant protein C, Aqp-5= Aquaporin 5, Krt14= Keratin 14, Krt18= Keratin 18, Krt5= Keratin 5, CFTR = Cystic fibrosis transmembrane conductance regulator; ENaC = Epithelial sodium channel, L= normal lung, K= normal kidney. ND= not detected. Data expressed as fold increase  $\pm$  SEM. \* $p < 0.05$  when compared relative expression of normal tissue. n=4 mice per group.

**Table S2. EXPRESSION OF EPITHELIAL PROTEINS BY DONOR CELLS IN LUNG**

| <b>Epithelial<br/>Proteins</b> | <b>CCSP<sup>+</sup><br/>BMC</b> | <b>CCSP<sup>-</sup><br/>BMC</b> | <b>p Value</b> |
|--------------------------------|---------------------------------|---------------------------------|----------------|
| <b>CCSP</b>                    | 79.53 ± 2.65%                   | 3.08 ± 1.78%                    | < 0.001        |
| <b>PanKr</b>                   | 74.14 ± 2.29%                   | 3.09 ± 1.79%                    | < 0.001        |
| <b>CFTR</b>                    | 60.61 ± 7.01%                   | 9.49 ± 3.00%                    | 0.002          |
| <b>ENaC</b>                    | 7.49 ± 2.17%                    | 0.00%                           | 0.041          |

BMC = Bone marrow cells; CCSP = Clara cell secretory protein; PanKr = pan cytokeratin; CFTR = Cystic fibrosis transmembrane conductance regulator; ENaC = Epithelial sodium channel. . The number of donor cells positive for both CMTMR and the epithelial cell-specific antigen was divided by the number of total CMTMR<sup>+</sup> cells and multiplied by 100 to give a percentage value. Data shown are means ± SEM. n=4 mice per group. Samples from mice administered with donor cells after 10 days of ganciclovir.

**Table S3.** Primers for real time PCR

| <b>Gene</b>                                                                       | <b>Symbol</b> | <b>Forward primer</b>           | <b>Reverse primer</b>         |
|-----------------------------------------------------------------------------------|---------------|---------------------------------|-------------------------------|
| <b>Clara cell secretory protein</b>                                               | CCSP          | ACATCACCCCACATCTACAGAC<br>ACCAA | TGAGGAGGGCCTCAAGGACT<br>TGAA  |
| <b>Cytochrome P450, family 2, subfamily f, polypeptide 2</b>                      | Cyp2f2        | GCATACCCCGTCTTTTTCAA            | TCATCGTCATAGTCGAAGCG          |
| <b>Paraoxonase 1</b>                                                              | Pon1          | TCCTCCCGGCTCAGAGGTGC            | TGCGTGCAGCTGGCTTGCA           |
| <b>Aldehyde oxidase 3</b>                                                         | Aox3          | TCGGTCTCCTGCAGAGCACAG<br>C      | AGGCGCCACAGTCACCTCCT          |
| <b>Flavin containing monooxygenase 3</b>                                          | Fmo3          | TCCCTGGGTGCCACCATCCC            | CAGCCATAGGAGATTGGGCT<br>TTGCA |
| <b>Claudin 10</b>                                                                 | Cldn10        | TCTGCAGTACCAACACCTTCA           | ATGTTAAAGCCAGCCCATGA          |
| <b>Mus musculus keratin 14</b>                                                    | Krt14         | AGCGGCAAGAGTGAGATTTCT           | CCTCCAGGTTATTCTCCAGG<br>G     |
| <b>Mus musculus keratin 18</b>                                                    | Krt18         | GACATCCGCGCCCAGTAT              | TCGGCAGACTTGGTGGTG            |
| <b>Mus musculus keratin 5</b>                                                     | Krt5          | GTCATGGCGATGACCTTCGA            | CTTGACGTTGTCAATTCAGA<br>TCT   |
| <b>Surfactant protein C</b>                                                       | Sftpc         | GCAAAGAGGTCCTGATGGAG            | GCAGTAGGTTCTGGAGCTG           |
| <b>Aquaporin 5</b>                                                                | Aqp5          | CAGCAACAACACAACACCA             | TGCGGCGGGAGTCCGTGGA           |
| <b>Cubilin</b>                                                                    | Cubilin       | AGTCAGTCCTGGCTCCTTGA            | GGTGATGTGGAAGCCTTTGT          |
| <b>Megalin</b>                                                                    | Megalin       | GGGACCGATGAGTCCCCGCT            | GGGTCACAAGCGCACCGGAA          |
| <b>Forkhead box J1</b>                                                            | Foxj1         | GCCGGCACATCAACTGCCCT            | CAGTCCTGCAGGTCAGCGGC          |
| <b>Cystic fibrosis transmembrane conductance regulator homolog (Mus musculus)</b> | CFTR          | GTGGCTGACACTTTGCTTGC            | GAATCCCACCTGCTTTCAGC          |
| <b>Sodium channel, nonvoltage-gated 1 alpha (Mus musculus)</b>                    | ENaC          | TGCAGTGTGACCAACTACAAG           | TCTCGAAGATCCAATCCTGG<br>G     |
| <b>18S ribosomal RNA</b>                                                          | 18S           | CGGCTACCACATCCAAGGAA            | GCTGGAATTACCGCGGCT            |
| <b>Sex determining region Y</b>                                                   | Sry           | GGGATGCAGGTGGAAAAGC             | GTGACACTTTAGCCCTCCGAT         |

**Table S4.** Immunohistochemistry, immunocytochemistry and FISH

| <b>Antibodies and probe</b>                                                  | <b>Blocking</b>                     | <b>Antibodies</b>                                                                                                       | <b>AlexaFluor-conjugated antibody</b>                                     | <b>Isotype controls</b>                               |
|------------------------------------------------------------------------------|-------------------------------------|-------------------------------------------------------------------------------------------------------------------------|---------------------------------------------------------------------------|-------------------------------------------------------|
| <b>CCSP</b>                                                                  | Normal Goat Serum <sup>a1</sup> .   | Anti-Clara Cell Secretory Protein (rabbit antiserum) <sup>a2</sup> .<br>1:1000 dilution                                 | AlexaFluor® 488- goat anti-rabbit IgG <sup>a3</sup> .<br>1:200 dilution   | Normal rabbit IgG <sup>a4</sup> .<br>1:1000 dilution  |
| <b>Ki-67</b>                                                                 | Normal Rabbit Serum <sup>a3</sup> . | Rat anti-mouse Ki-67 <sup>a5</sup> .<br>1:50 dilution<br>Biotinylated Rabbit Anti-Rat <sup>a5</sup> .<br>1:200 dilution | Streptavidin, AlexaFluor® 488 conjugate <sup>a3</sup> .<br>1:200 dilution | Purified Rat IgG <sup>a6</sup> .<br>1:50 dilution     |
| <b>β-tubulin IV</b>                                                          | Normal Goat Serum <sup>a1</sup> .   | Mouse anti-β-Tubulin IV <sup>a7</sup> .<br>1:50 dilution                                                                | AlexaFluor® 488 goat anti-mouse IgG <sup>a3</sup> .<br>1:200 dilution     | Purified Mouse IgG <sup>a3</sup> .<br>1:50 dilution   |
| <b>Cytokeratins</b>                                                          | Normal Goat Serum <sup>a1</sup> .   | Mouse anti-pan-cytokeratin AE1/AE3 <sup>a8</sup> .                                                                      | AlexaFluor® 488 goat anti-mouse IgG <sup>a3</sup> .<br>1:200 dilution     | Purified Mouse IgG <sup>a3</sup> .<br>1:50 dilution   |
| <b>CFTR</b>                                                                  | Normal Goat Serum <sup>a1</sup> .   | Mouse anti CFTR <sup>a9</sup><br>3:37 dilution                                                                          | AlexaFluor® 488 goat anti-mouse IgG <sup>a3</sup> .<br>1:200 dilution     | Purified Mouse IgG <sup>a3</sup> .<br>3:37 dilution   |
| <b>ENaC</b>                                                                  | Normal Goat Serum <sup>a1</sup> .   | Rabbit anti-ENaC <sup>a10</sup><br>1:100 dilution                                                                       | AlexaFluor® 488- goat anti-rabbit IgG <sup>a3</sup> .<br>1:200 dilution   | Normal rabbit IgG <sup>a4</sup> .<br>1:100 dilution   |
| <b>Mouse WCP FITC Chromosome Y probe <sup>a11</sup> and Cytokeratin CCSP</b> | Normal Goat Serum <sup>a1</sup> .   | Mouse anti-pan-cytokeratin AE1/AE3 <sup>a8</sup> .                                                                      | AlexaFluor® 488 goat anti-mouse IgG <sup>a3</sup> .<br>1:200 dilution     | Purified Mouse IgG <sup>a3</sup> .<br>1:50 dilution   |
| <b>CCSP</b>                                                                  | Normal Goat Serum <sup>a1</sup> .   | Anti-Clara Cell Secretory Protein (rabbit antiserum) <sup>a2</sup> .<br>1:1000 dilution                                 | Goat anti Rabbit IgG Biotinylated <sup>a12</sup> .<br>1:200 dilution      | Normal rabbit IgG <sup>a4</sup> .<br>1:1000 dilution  |
| <b>MHC II</b>                                                                | Normal Goat Serum <sup>a1</sup> .   | Anti-Mouse MHC Class II (I-a/I-E) <sup>a13</sup><br>10 µg/ml dilution                                                   | AlexaFluor® 488 goat anti-rat IgG <sup>a3</sup> .<br>1:200 dilution       | Purified Rat IgG <sup>a6</sup> .<br>10 µg/ml dilution |

<sup>a1</sup>. Vector Laboratories Inc, Burlingame, CA. <sup>a2</sup>. Upstate Laboratories, Trecemcula, CA. <sup>a3</sup>. Invitrogen, Eugene, OR. <sup>a4</sup>. *Imgenex* Corp, San diego, CA. <sup>a5</sup>. Dako, Mississauga, Canada. <sup>a6</sup>. Invitrogene, Carlsbad, CA. <sup>a7</sup>. Sigma. <sup>a8</sup>. Abcam, Cambridge, MA. <sup>a9</sup>R & D, Minneapolis, MN USA. <sup>a10</sup>Chemicon, Temecula, California. <sup>a11</sup>*Cambio, Cedarlane* Laboratories, Hornby, Ontario. <sup>a12</sup>VECTASTAIN Elite ABC kit Goat anti Rabbit IgG Biotinylated, Vector Laboratories Inc, Burlingame, CA. <sup>a13</sup> eBiosciences, San Diego , CA.

## SUPPLEMENTARY FIGURE LEGENDS

### Figure S1. Characterization of the CCSP<sup>+</sup> BMC population in FVBn mice.

Representative flow histograms of BMC freshly isolated (a) or 7 days after culture (b) show a population of CCSP<sup>+</sup> BMC (red) that in fresh bone marrow contained  $1.74 \pm 0.16\%$  CCSP<sup>+</sup> cells, which expanded in culture to  $22.42 \pm 1.66\%$  compared to isotype staining (green). Data shown are means  $\pm$  SEM. To test the possibility that the CCSP protein was present in the BMC by adsorption the quantitative RT-PCR gene expression for cubilin (c) and megalin (d) was assessed on FACS-sorted CCSP<sup>+</sup> BMC (+) and CCSP<sup>-</sup> BMC (-). The dissociation curves shown cubilin expression only in CCSP<sup>-</sup> BMC and no expression of megalin by any of both groups compared to the gene expression in normal Kidney (K) where both CCSP receptors are expressed. (e) FACS-sorted CCSP<sup>+</sup> BMC showed expression of CCSP while the CCSP<sup>-</sup> BMC did not express the gene; both groups were compared to a normal lung (L) sample that also showed amplification for CCSP. Immunocytochemistry using 3 different antibodies for CCSP: anti-CCSP upstate antibody (f and j), anti-CC10S20 Santa Cruz antibody (g and k) and anti-CC10T18 Santa Cruz antibody (h and l), showed that most sorted CCSP<sup>+</sup> BMC had a positive staining for all the antibodies after sorting (f-h), and retained this CCSP expression for at least three days after sorting (j-l). In contrast the CCSP<sup>-</sup> BMC didn't show expression of CCSP on fresh or 3 days cultured sorted cells (i and m). n=4 samples per group.

**Figure S2. Ablation of CCSP<sup>+</sup> cells in CCtk mice treated with ganciclovir.**

Immunohistochemical analysis of CCSP expression in lung tissue from wild type (FVBn) or CCtk transgenic animals treated with saline or ganciclovir 4.5 mg/day for 10 days is shown. Antigen-antibody complexes were detected with 3,3'-diaminobenzidine and tissue was counterstained with hematoxylin. CCSP<sup>+</sup> cells (brown staining) in lungs from FVBn (a) and CCtk (c) mice treated with saline or FVBn mice treated with ganciclovir (b) showed a normal distribution of CCSP<sup>+</sup> cells in the airways while CCtk mice treated with ganciclovir (d) showed a dramatic depletion of CCSP<sup>+</sup> cells. Green insets: higher-magnification image of boxed region. Black insets: representative isotype staining controls. n=4 mice per group.



**Figure S3. Transtracheal administration of CCSP<sup>+</sup> BMC at 5 days of ganciclovir treatment has a beneficial effect.** (a) Female CCtk mice were administered with ganciclovir (GCV) 4.5 mg/day for 10 days. Transtracheal administration of 1.3 million FACS-sorted, CMTMR-labeled CCSP<sup>+</sup> or CCSP<sup>-</sup> BMC from male wild type mice was performed at day 5 of ganciclovir treatment. Lung analysis was performed 7 days after cell delivery. (b) Quantitative RT-PCR for the Sry gene shown that mice treated with CCSP<sup>+</sup> BMC at day 5 had 9.1 times more male cells in the lung compared to mice treated with CCSP<sup>-</sup> BMC (\*p<0.01), while no amplification of male DNA was detected (ND) in lungs from mice treated with saline. There was no difference in CCSP<sup>+</sup> BMC retention comparing day 5 or 10 of ganciclovir as the day of cell delivery. (c) Administration of CCSP<sup>+</sup> BMC after 5 days of ganciclovir treatment increased survival while none of the mice treated with CCSP<sup>-</sup> BMC survived for 10 days (\*p<0.05). There was no difference in survival between groups administered CCSP<sup>+</sup> BMC at either day 5 or day 10 of ganciclovir treatment. (d) Lung sections from mice treated with CCSP<sup>-</sup> BMC showed 0.11 ± 0.08% of donor cells identified by CMTMR<sup>+</sup> DAPI<sup>+</sup> staining (red cytoplasm with blue nucleus; percentage based on 1 DAPI<sup>+</sup> CMTMR<sup>+</sup> cell per 100 DAPI<sup>+</sup> cells) while (e) mice treated with CCSP<sup>+</sup> BMC showed 2.01 ± 0.43% of donor cells (\*p=0.013). Insets show high-power magnification areas with donor cells. Data shown are means ± SEM. n=8 mice per group.

**Figure S4. CCtk mice treated with CCSP<sup>+</sup> BMC have preserved epithelium in small airways.** Mice treated with CCSP<sup>-</sup> BMC (a) have a poorly preserved epithelium in small airways when compared to (b) mice treated with CCSP<sup>+</sup> BMC. Green insets: higher-magnification image of boxed region. Confocal microscopic analysis of the ciliated cell marker  $\beta$ -tubulin IV (c-f) shown that donor cells (CMTMR<sup>+</sup>; red fluorescence) do not express  $\beta$ -tubulin (green fluorescence) but are surrounded by host  $\beta$ -tubulin<sup>+</sup> squamous cells in the CCSP<sup>+</sup> BMC group. The basal regions of these  $\beta$ -tubulin<sup>+</sup> squamous cells is extended covering the bronchiolar surface (d and f). There were areas where donor and host cells expressed CCSP (g-j; green fluorescence) in the small airways of CCSP<sup>+</sup> BMC group. Insets are representative isotype staining controls. Arrows point to donor cells and arrowheads indicate host positive cells. Scale bar represents 10  $\mu$ m. n=4 mice per group. Samples from mice administered with cells after 10 days of ganciclovir.

**Figure S5. CCSP<sup>+</sup> BMC express CFTR and ENaC, while CCSP<sup>-</sup> cells express only CFTR.** Immunocytochemistry was carried out on isolated bone marrow cells for CFTR (a-d) and ENaC (e-h). Isolated CCSP<sup>-</sup> cells stained positive for CFTR (a,b), but were negative for ENaC (e,f). Approximately 30% of CCSP<sup>+</sup> cells were weakly positive for CFTR (c,d) and 15% were positive for ENaC (g,h). Isotype controls for CFTR (i) and ENaC (j) are also shown.

**Figure S6. Corroboration of donor origin for CMTMR<sup>+</sup> cells.** To evaluate whether the CMTMR (red fluorescence) label could be acquired by phagocytosis or efferocytosis the expression of the MHC II protein was analyzed by immunohistochemistry showing that only  $1.2 \pm 0.87\%$  of the CMTMR<sup>+</sup> donor cells were positive for MHC II for the CCSP<sup>+</sup> BMC group (a-c). As donors and recipients were sex-mismatched it was possible to track the donor cells by confocal microscopy analysis for lung sections stained for Y-chromosome FISH and then subjected to immunohistochemistry for the pan-cytokeratin epithelial cell marker (d-f). Finally the proliferation of the donor BMC by the expression of the cell proliferation marker Ki67 shown no significant differences in proliferative index of donor CCSP<sup>+</sup> BMC ( $1.8 \pm 0.69\%$ ; g-i) and CCSP<sup>-</sup> BMC (0%;  $p=0.08$ ). Arrows point to donor cells and arrowheads indicate host positive cells. Scale bar represents 10  $\mu\text{m}$ .  $n=4$  mice per group. Samples from mice administered with cells after 10 days of ganciclovir.

**Figure S7. Expression of MHCII.** Immunocytochemistry was carried out on sorted bone marrow cells for MHC II. Isolated CCSP<sup>-</sup> cells showed no expression of MHCII (a,b), while a few sorted CCSP<sup>+</sup> cells were found to faintly express MHCII (c,d). Isotype control is also shown (e).

Fig.S1

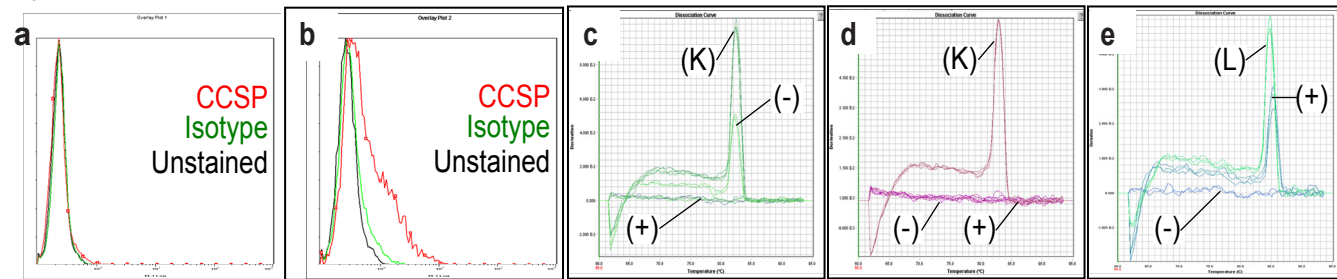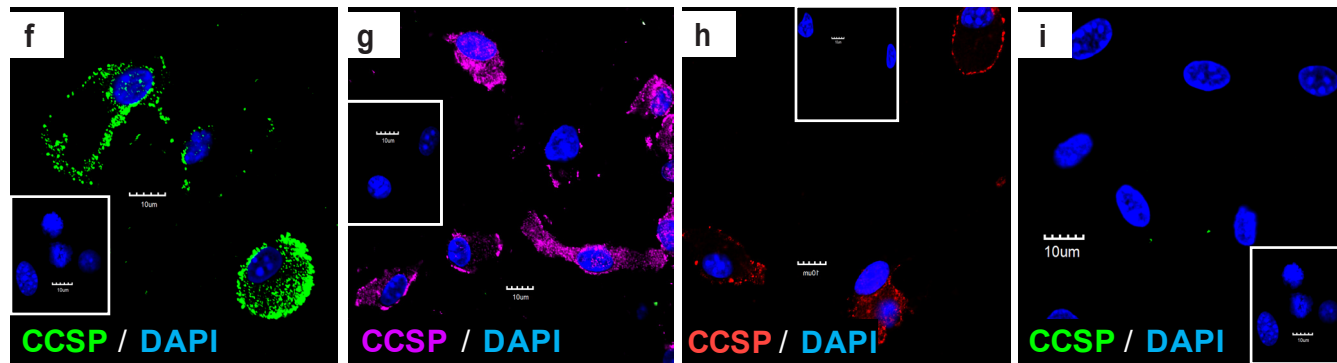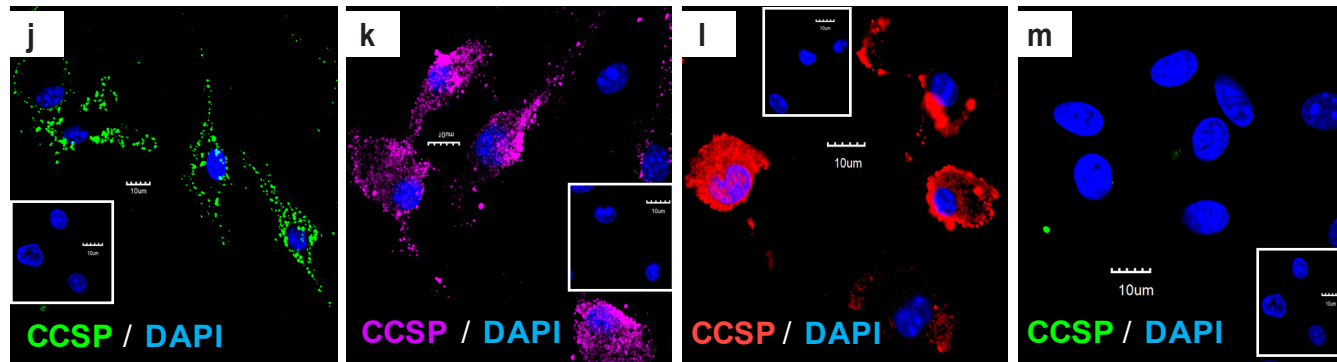

Fig.S2

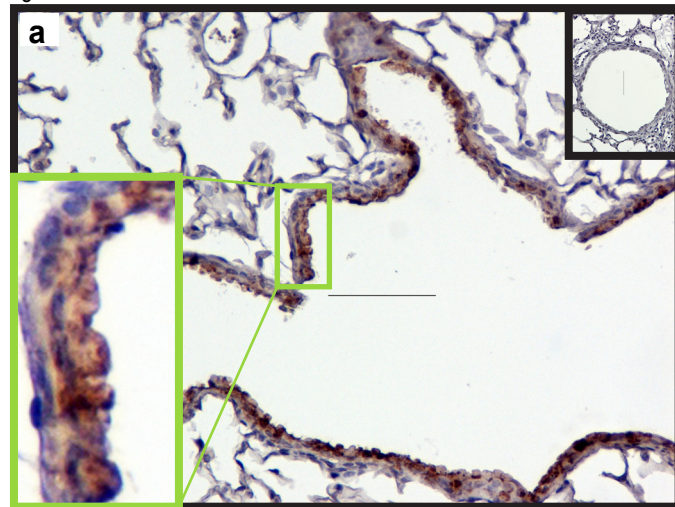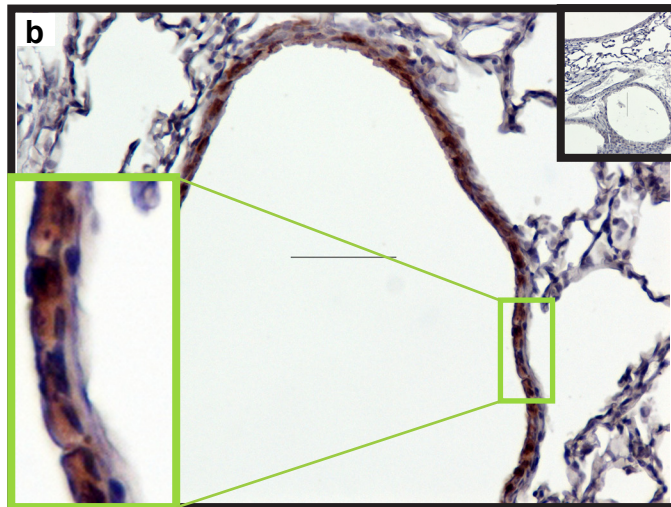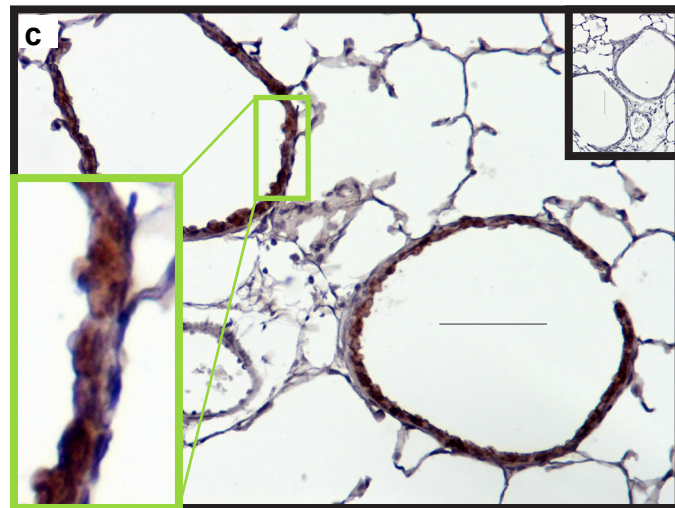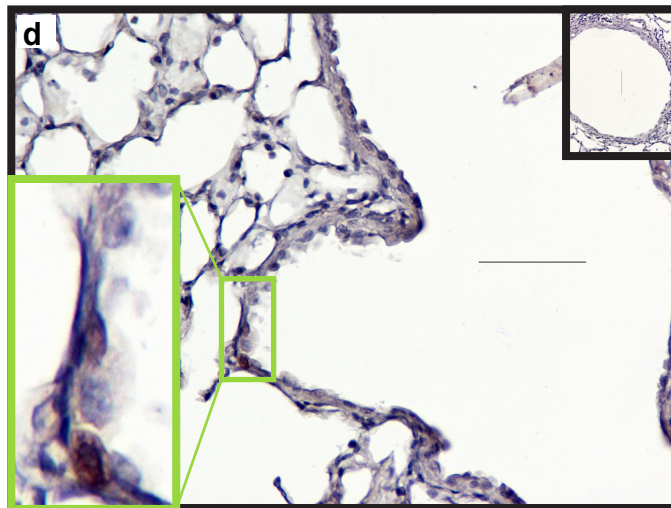

Fig.S3

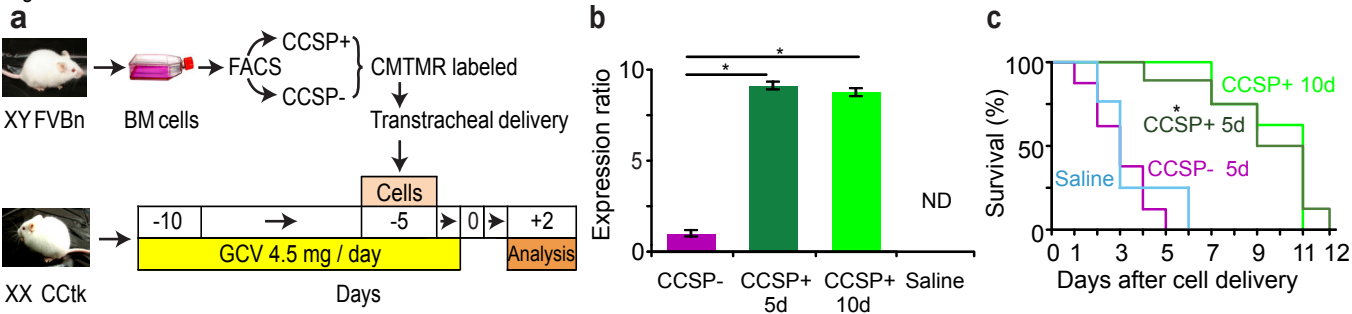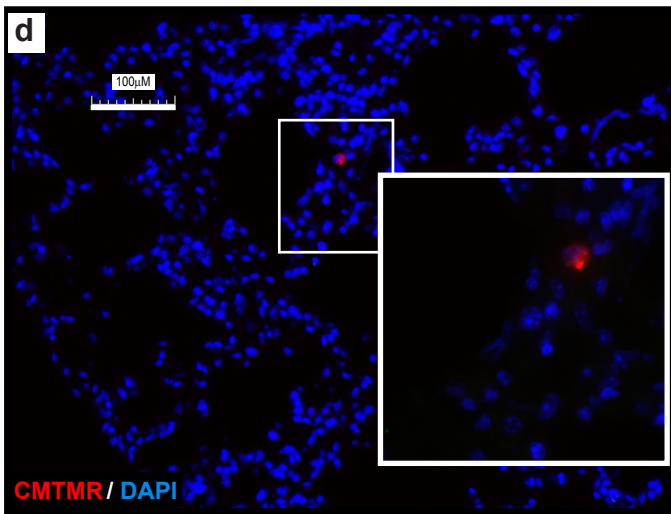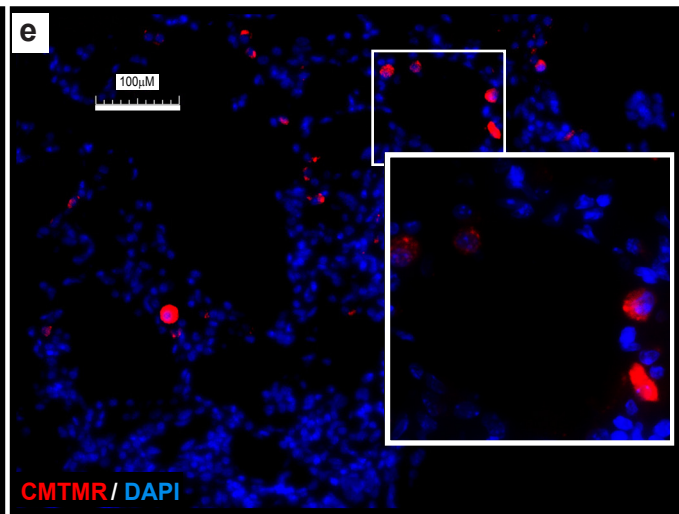



Fig.S5

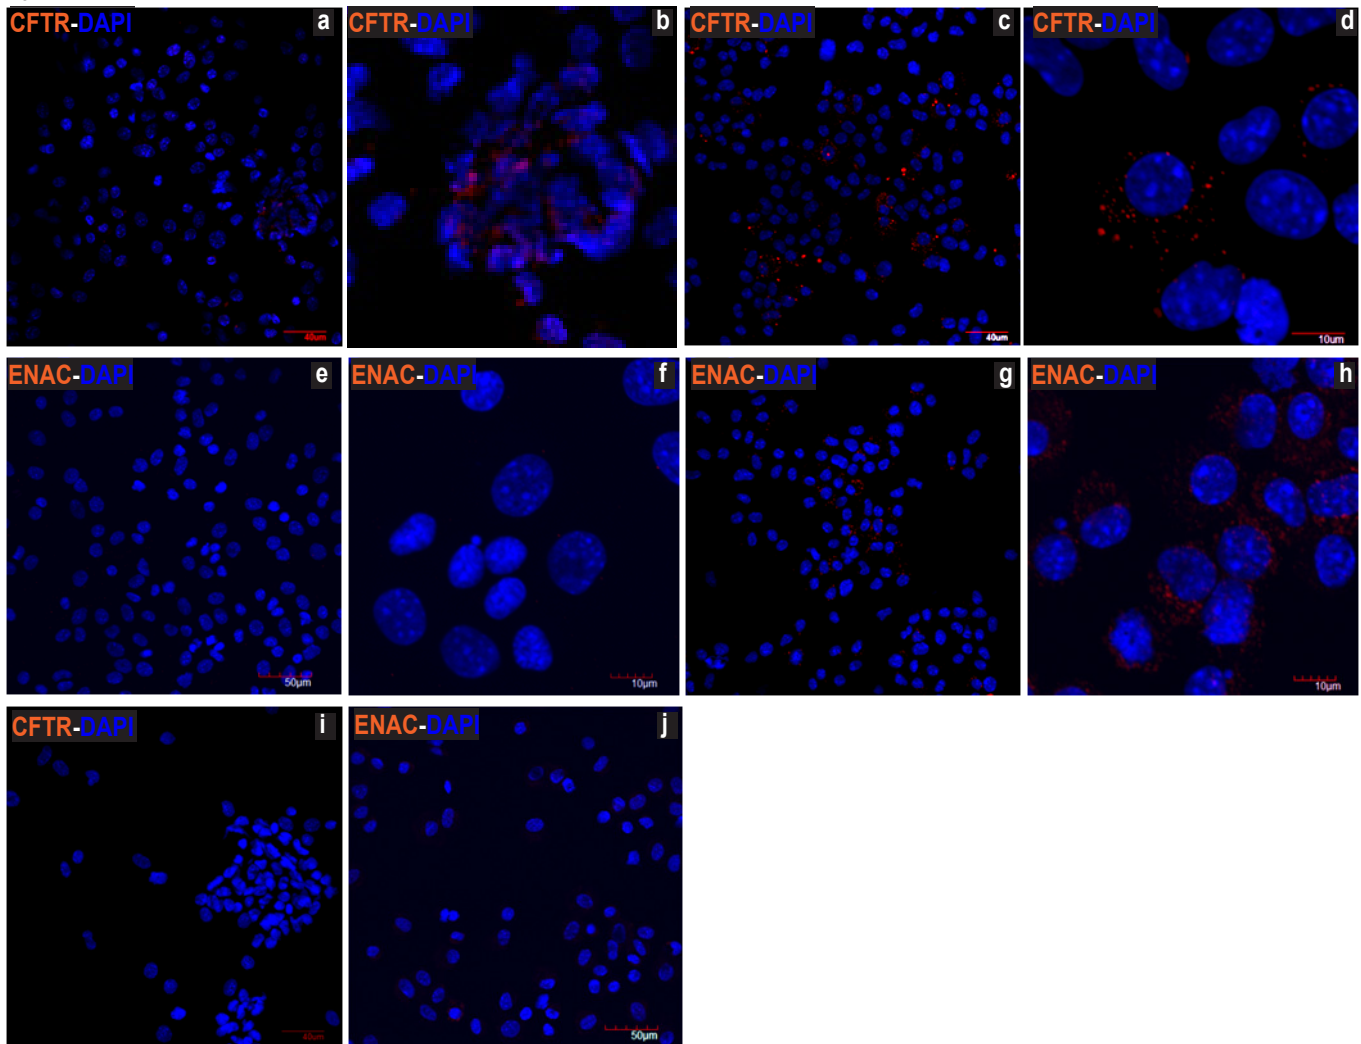



Fig.S6

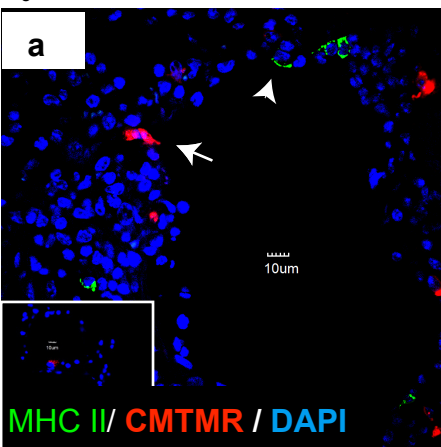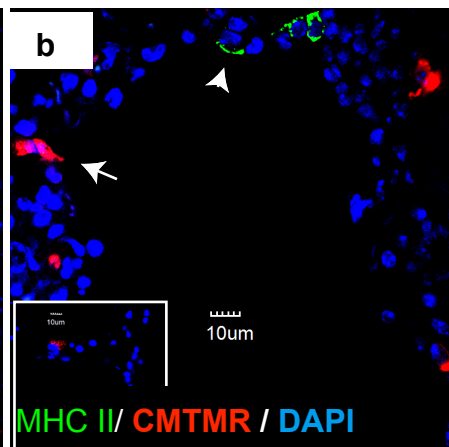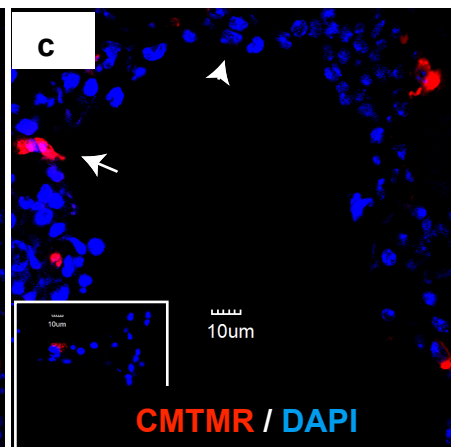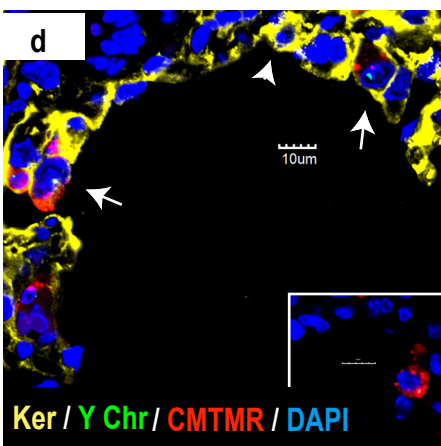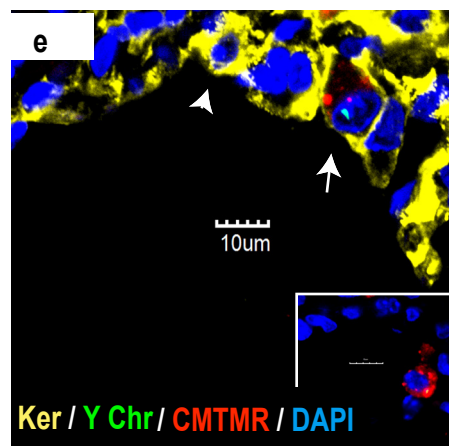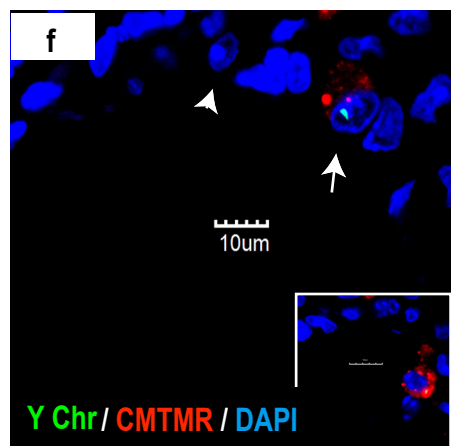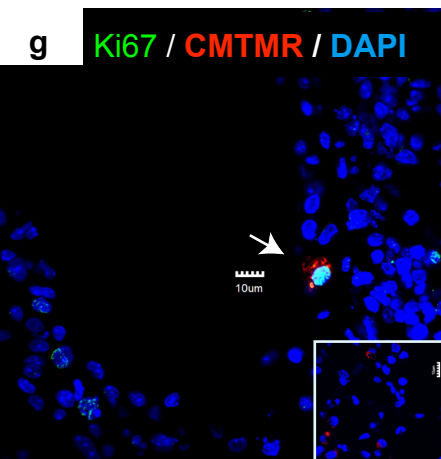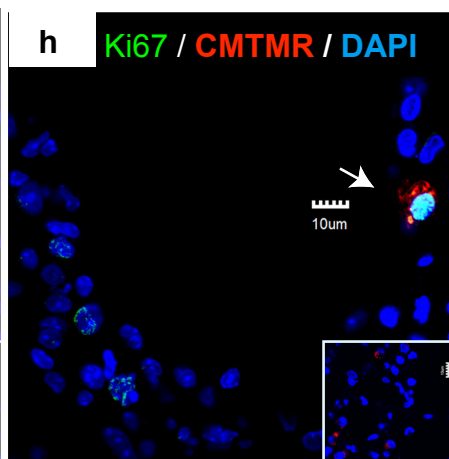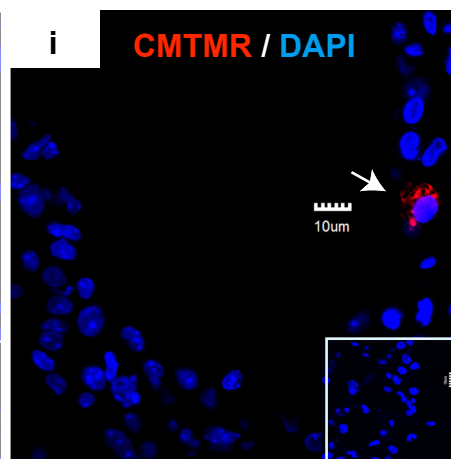

Fig.S7

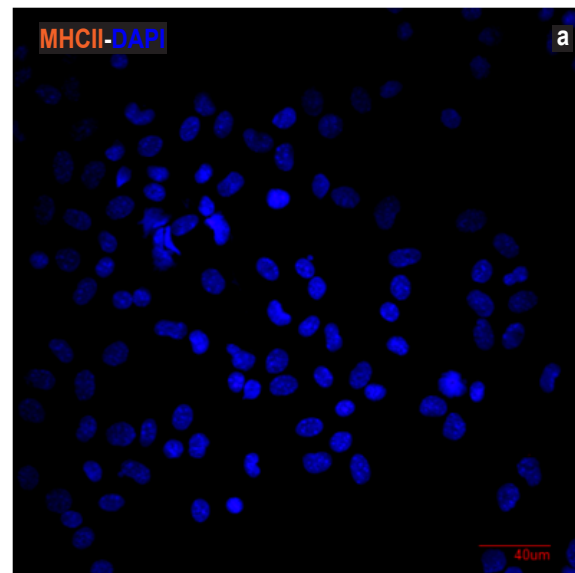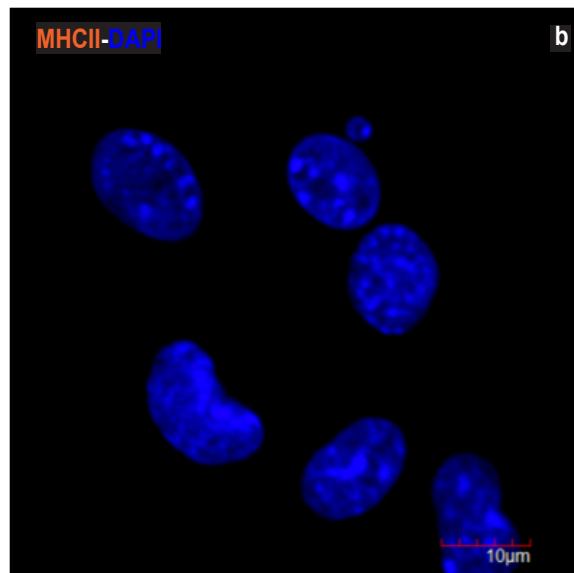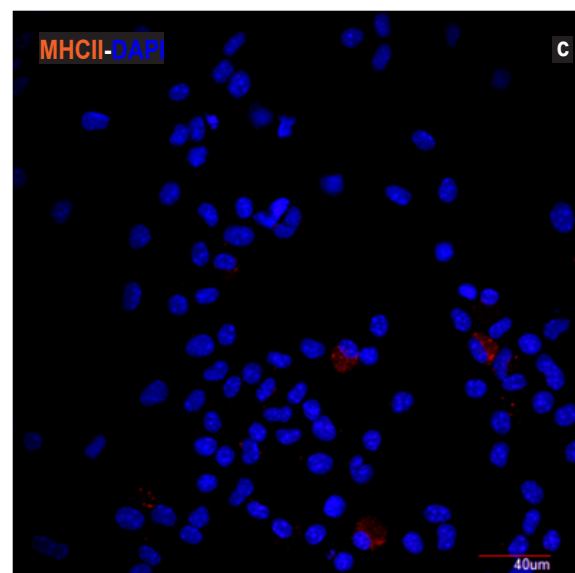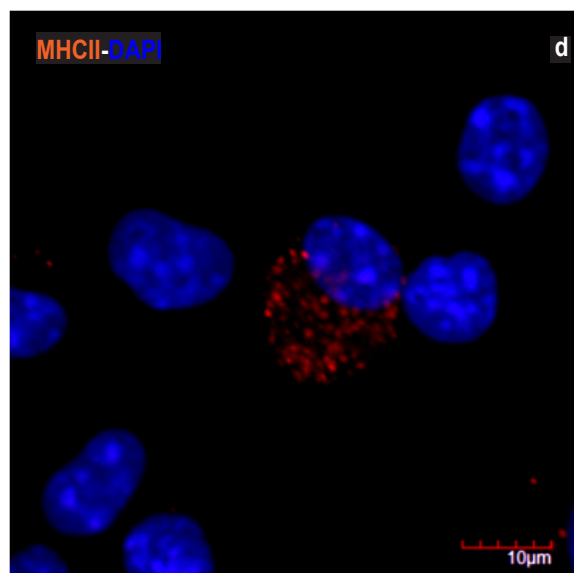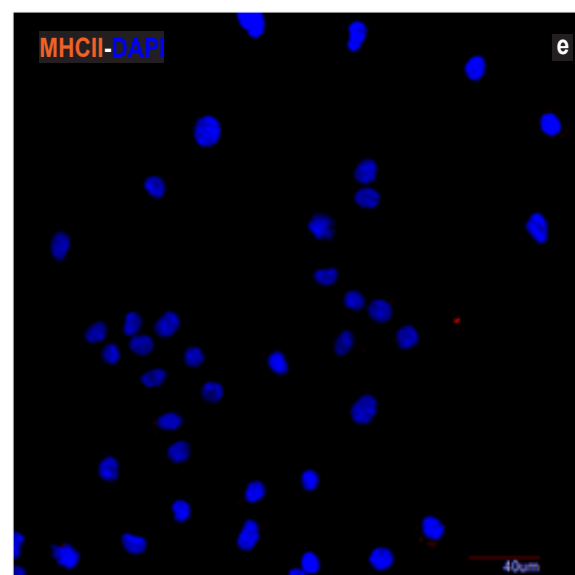

Supplement: mt201353x1.pdf [file mt201353x1.pdf]
